# Supplementary material for: The effect of increased resolution of geostationary satellite imageries on predictability of tropical thunderstorms over Southeast Asia
Source: Copernicus journal article supplement (doi:10.5194/nhess-2018-357), 2018-12-14
Supplement: Supplementary file [file nhess-2018-357-AC3-supplement.pdf]

## Answers to the comments of NHESS-2018-357-RC1-supplement

We thank to the reviewer of RC1-supplement for his/her productive comments and thoughtful guide. He/she not only indicated the crucial points in our research but also suggested the way how to improve them. Thanks to the comments, the manuscript has been revised as follows.

### Major overarching issues:

- The number of events (clouds) considered in this manuscript should be increased. To validate the efficacy of this approach, images from other months and from both day and night should be considered. The authors' comment about considering daytime only because "the floating population is most active during the daytime" is misinformed. During darkness, many people will be asleep and the lack of direct sunlight may impair the ability of the population to respond to the given hazard effectively. An improvement of lead time during darkness would be a significant contribution to the body of research. As such, it is recommended that both day and night are considered in this analysis.

This is a very helpful comment. Only eight clouds are a small number to show enough conclusions. We selected clouds that occurred during the day and night in July and August 2017. We added a total of 60 cloud cases, 30 per month. Specifically, Table 1 shows information about cloud data. It's a good idea to add 2018 data. However, we didn't have enough time to get the 2018 data. Instead, we used data for two months in 2017 which are July and August, when tropical clouds were frequently observed each year.

**Table 1. The observation time and number of observed clouds in this study.**

| Date         | Observation time          | Number of observed clouds |
|--------------|---------------------------|---------------------------|
| July, 2017   | 03:00 - 06:50 UTC (Day)   | 20                        |
|              | 21:00 - 24:50 UTC (Night) | 10                        |
| August, 2017 | 03:00 - 06:50 UTC (Day)   | 20                        |
|              | 21:00 - 24:50 UTC (Night) | 10                        |

### **Specific comments:**

**The new manuscript has changed the number of lines and pages. The answer below is accompanied by the number of pages and lines.**

- P1 L10: suggest using the term ‘significant damage’ instead of ‘heavy damage’.

Corrected as below

p. 1 line 10 : Tropical thunderstorms cause significant damage to property and lives

- P1 L27: change ‘lost’ to ‘loss’.

Corrected as below

p. 2 line 6-7 : These severe events lead to extensive economic losses, environmental degradation, and subsequently, damage to human life.

- P2 L3: what about storm surge and coastal inundation?

Corrected as below and written the reference

p. 2 line 2-4 : Impacts from recent climate-related extremes, such as heat waves, droughts, floods, cyclones and wildfires, reveal significant vulnerability and exposure of some ecosystems and many human systems to current climate variability (Pachaurim and Meyer, 2014).

- P2 L11: what do you mean by “grounded”? Do you mean ground-truthed?

Removed

- P3 L5: suggest changing “growing” to “developing”.

Corrected as below

p. 3 line 19 : convective clouds which are developing within 2 hours

- P3 L6: why is only August considered? This needs to be clarified. The review recommends considering other months in this analysis.

- P6 L2: This study is validated using a small number of clouds, over a small range, during daylight hours. This needs to be clarified in this sentence.

**It is a common answer to the above two questions.**

We added a total of 60 cloud cases. Table 3 shows the result of lead time according to imager; No. 1-20 occurred during the day of July, No. 21-30 occurred during the night of July, No. 31-50 occurred during the day of August and No. 51-60 occurred during the night of August.

Table 3. The lead time according to imagery for cloud No. 1-20 occurred in the daytime of July 2017, No. 21-30 in the nighttime of July 2017, No. 31-50 in the daytime of August 2017, and No. 51-60 in the nighttime of August 2017.

| No. | Cloud scale<br>(km) | Lead time (min)               |                               | Lead time difference<br>(min)<br>(A – B) |
|-----|---------------------|-------------------------------|-------------------------------|------------------------------------------|
|     |                     | 2 km and 10 min imager<br>(A) | 4 km and 30 min imager<br>(B) |                                          |
| 1   | 120                 | 180                           | 60                            | 120                                      |
| 2   | 104                 | 160                           | 30                            | 130                                      |
| 3   | 120                 | 140                           | 30                            | 110                                      |
| 4   | 120                 | 180                           | 30                            | 150                                      |
| 5   | 120                 | 180                           | 60                            | 120                                      |
| 6   | 40                  | 130                           | 30                            | 100                                      |
| 7   | 40                  | 140                           | 0                             | 140                                      |
| 8   | 44                  | 120                           | 0                             | 120                                      |
| 9   | 64                  | 120                           | 30                            | 90                                       |
| 10  | 40                  | 180                           | 60                            | 120                                      |
| 11  | 40                  | 130                           | 0                             | 130                                      |
| 12  | 48                  | 90                            | 0                             | 90                                       |
| 13  | 96                  | 180                           | 60                            | 120                                      |
| 14  | 104                 | 120                           | 0                             | 120                                      |
| 15  | 120                 | 140                           | 30                            | 110                                      |
| 16  | 80                  | 180                           | 60                            | 120                                      |
| 17  | 56                  | 100                           | 0                             | 100                                      |
| 18  | 80                  | 180                           | 30                            | 150                                      |
| 19  | 96                  | 180                           | 0                             | 180                                      |
| 20  | 56                  | 100                           | 0                             | 100                                      |
| 21  | 40                  | 160                           | 0                             | 160                                      |
| 22  | 72                  | 150                           | 30                            | 120                                      |
| 23  | 120                 | 140                           | 30                            | 110                                      |
| 24  | 96                  | 120                           | 30                            | 90                                       |
| 25  | 84                  | 130                           | 0                             | 130                                      |
| 26  | 100                 | 180                           | 60                            | 120                                      |
| 27  | 60                  | 100                           | 0                             | 100                                      |
| 28  | 100                 | 130                           | 0                             | 130                                      |
| 29  | 104                 | 120                           | 0                             | 120                                      |
| 30  | 96                  | 180                           | 60                            | 120                                      |
| 31  | 100                 | 120                           | 30                            | 90                                       |
| 32  | 32                  | 100                           | 0                             | 100                                      |
| 33  | 48                  | 120                           | 30                            | 90                                       |
| 34  | 100                 | 180                           | 30                            | 150                                      |
| 35  | 112                 | 180                           | 60                            | 120                                      |
| 36  | 64                  | 120                           | 30                            | 90                                       |
| 37  | 100                 | 180                           | 60                            | 120                                      |
| 38  | 96                  | 140                           | 0                             | 140                                      |
| 39  | 68                  | 120                           | 0                             | 120                                      |
| 40  | 80                  | 130                           | 30                            | 100                                      |
| 41  | 44                  | 90                            | 0                             | 90                                       |
| 42  | 60                  | 100                           | 0                             | 100                                      |
| 43  | 100                 | 120                           | 0                             | 120                                      |
| 44  | 96                  | 120                           | 30                            | 90                                       |
| 45  | 68                  | 100                           | 0                             | 100                                      |
| 46  | 88                  | 140                           | 30                            | 110                                      |
| 47  | 108                 | 180                           | 30                            | 150                                      |

|    |     |     |    |     |
|----|-----|-----|----|-----|
| 48 | 124 | 180 | 60 | 120 |
| 49 | 104 | 140 | 0  | 140 |
| 50 | 100 | 120 | 0  | 120 |
| 51 | 120 | 130 | 30 | 100 |
| 52 | 66  | 110 | 0  | 110 |
| 53 | 80  | 130 | 0  | 130 |
| 54 | 120 | 180 | 60 | 120 |
| 55 | 120 | 100 | 0  | 100 |
| 56 | 40  | 180 | 30 | 150 |
| 57 | 56  | 180 | 0  | 180 |
| 58 | 56  | 100 | 0  | 100 |
| 59 | 88  | 160 | 0  | 160 |
| 60 | 92  | 180 | 30 | 150 |

- P3 L22: check the date for Schmit et al., reference.

Corrected as below

p. 4, line 6 : (Schmit et al., 2005).

- P3 L29: change “statuses” to “status”.

Corrected as below

p. 4, line 14 : the current status of clouds

- P4 L15: check the date for Housze reference.

Corrected as below

p. 4, line 11 : (Houze, 2004)

- P4 L18-L19: check grammar.

“grammar check is completed”

p. 5, line 6-7 : The interesting point of Figure 2 is the pattern of temporal changes in minimum BT11 among the thunderstorm pixels for high-resolution imagery. One can expect that BT11 of a thunderstorm might gradually decrease, but the BT11 of the targeted thunderstorm firstly decrease from the initial state to −70 minutes and increase slightly from −70 minutes to −30 minutes. We inferred that the decline of BT11 relates to the vertical growth of the cloud, while the increase of BT11 after reaching the mature state relates to the horizontal expansions of the cloud. This is commonly observed in the life cycle of tropical thunderstorms. It is notable that BT11 for low-resolution imagery is too simple to monitor the status of clouds in detail.

- P5 L5: Is “100 min” a typo? Do you mean 10 min?

10 minutes

- Fig 2a: Including coordinates and a continent basemap would be useful.

p. 12

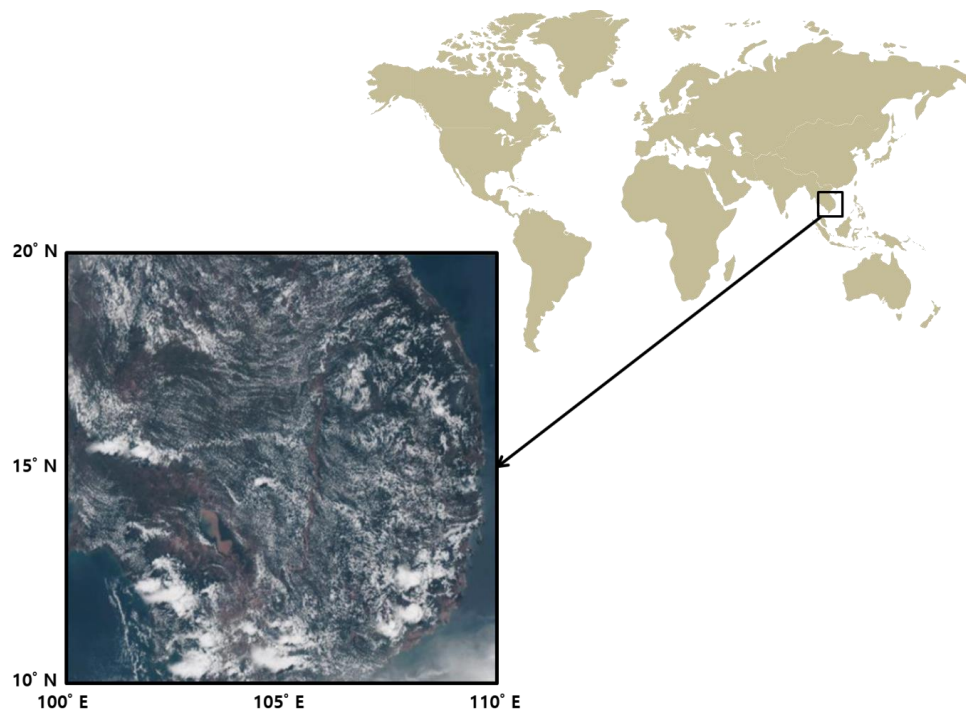

**Figure 1. Himawari-8 AHI RGB image taken for this study area on 19 August 2015, 05:50 UTC. Several convective clouds (white color) are shown in the southern part of the area**
